# Supplementary material for: Neoadjuvant Carboplatin/Paclitaxel versus 5-Fluorouracil/Cisplatin in Combination with Radiotherapy for Locally Advanced Esophageal Squamous Cell Carcinoma: A Multicenter Comparative Study
Source: Cancers (Basel). 2022 May 25;14(11):2610. doi: 10.3390/cancers14112610 (PMC9179264; doi:10.3390/cancers14112610)
Supplement: Supplementary file 1 [file cancers-14-02610-s001.zip › cancers-1701088-supplementary.pdf]

**Table S1.** Preoperative outcomes of patients in the original cohort

| Variable                           | CROSS ( <i>n</i> = 124) | PF5040 ( <i>n</i> = 105) | PF4500 ( <i>n</i> = 105) | <i>P</i> value |
|------------------------------------|-------------------------|--------------------------|--------------------------|----------------|
| Chemotherapy completion (>80%)     | 111 (89.5)              | 80 (76) <sup>a</sup>     | 94 (90) <sup>b</sup>     | .009           |
| Radiotherapy dose, cGy             | 4400 ± 161              | 4964 ± 250 <sup>a</sup>  | 4438 ± 138 <sup>b</sup>  | <.001          |
| Weight loss, %                     | -1.5 ± 6.0              | -2.9 ± 9.0               | -3.7 ± 9.2               | .11            |
| Weight loss >10%                   | 11 (9)                  | 16 (15)                  | 19 (19)                  | .081           |
| Surgical resection rate            | 92 (74)                 | 77 (73)                  | 70 (67)                  | .41            |
| Reasons for not undergoing surgery |                         |                          |                          | .52            |
| Disease progression                | 13 (11)                 | 14 (13)                  | 14 (13)                  | .73            |
| Patient refusal                    | 11 (9)                  | 11 (11)                  | 14 (13)                  | .56            |
| Poor physical conditions           | 7 (6)                   | 2 (2)                    | 3 (3)                    | .33            |
| Death during nCRT                  | 1 (1)                   | 1 (1)                    | 4 (4)                    | .33            |

Abbreviations: nCRT= neoadjuvant chemoradiotherapy

<sup>a</sup>Statistically significant difference *versus* the CROSS group after application of the Bonferroni's correction for multiple comparisons.

<sup>b</sup>Statistically significant difference *versus* the PF5040 group after application of the Bonferroni's correction for multiple comparisons.

Data are presented as means ± standard deviations or counts and percentages, as appropriate.

**Table S2.** Perioperative outcomes of patients in the original cohort

| Variable                                             | CROSS<br>( <i>n</i> = 92) | PF5040<br>( <i>n</i> = 77) | PF4500<br>( <i>n</i> = 70) | <i>P</i> value |
|------------------------------------------------------|---------------------------|----------------------------|----------------------------|----------------|
| Time from termination of nCRT to surgery, days       | 64 ± 27                   | 60 ± 22                    | 65 ± 22                    | .36            |
| Thoracic approach                                    |                           |                            |                            | .82            |
| Thoracotomy                                          | 4 (4)                     | 2 (3)                      | 2 (3)                      |                |
| Thoracoscopy                                         | 88 (96)                   | 75 (97)                    | 68 (97)                    |                |
| Abdominal approach                                   |                           |                            |                            | <.001          |
| Laparotomy                                           | 11 (12)                   | 26 (34) <sup>a</sup>       | 25 (36) <sup>a</sup>       |                |
| Laparoscopy                                          | 81 (88)                   | 51 (66) <sup>a</sup>       | 45 (64) <sup>a</sup>       |                |
| Type of resection                                    |                           |                            |                            | .35            |
| Ivor Lewis                                           | 8 (9)                     | 5 (6)                      | 2 (3)                      |                |
| McKeown                                              | 84 (91)                   | 72 (94)                    | 68 (97)                    |                |
| Postoperative complications                          |                           |                            |                            |                |
| Anastomotic leak                                     | 10 (11)                   | 18 (23)                    | 19 (27) <sup>a</sup>       | .019           |
| Chylothorax                                          | 2 (2)                     | 4 (5)                      | 3 (4)                      | .58            |
| Pulmonary                                            | 13 (14)                   | 8 (10)                     | 15 (21)                    | .17            |
| Complication severity (Clavien-Dindo classification) |                           |                            |                            | .098           |
| None                                                 | 40 (44)                   | 38 (49)                    | 22 (31)                    |                |
| Minor (1-3a)                                         | 40 (44)                   | 25 (33)                    | 38 (54)                    |                |
| Major or death (3b-5)                                | 12 (13)                   | 14 (18)                    | 10 (14)                    |                |
| Postoperative stay, days                             | 20.7 ± 16.3               | 23.2 ± 18.6                | 24.1 ± 17.8                | .45            |
| 30-day mortality rate                                | 3 (3)                     | 2 (4)                      | 2 (3)                      | >.99           |
| T stage                                              |                           |                            |                            | .011           |
| T0                                                   | 31 (34)                   | 39 (51)                    | 26 (37)                    |                |
| T1                                                   | 13 (14)                   | 10 (13)                    | 7 (10)                     |                |
| T2                                                   | 11 (12)                   | 12 (16)                    | 15 (21)                    |                |

|                               |             |                         |                          |       |
|-------------------------------|-------------|-------------------------|--------------------------|-------|
| T3                            | 36 (39)     | 14 (18) <sup>a</sup>    | 16 (23)                  |       |
| T4                            | 1 (1)       | 2 (3)                   | 6 (9)                    |       |
| N stage                       |             |                         |                          | .25   |
| N0                            | 72 (78)     | 60 (78)                 | 47 (67)                  |       |
| N1                            | 15 (16)     | 14 (18)                 | 16 (23)                  |       |
| N2                            | 2 (2)       | 3 (4)                   | 6 (9)                    |       |
| N3                            | 3 (3)       | 0(0)                    | 1 (1)                    |       |
| M stage                       |             |                         |                          | .11   |
| M0                            | 92 (100)    | 74 (96)                 | 67 (96)                  |       |
| M1                            | 0 (0)       | 3 (4)                   | 3 (4)                    |       |
| Number of dissected nodes     | 27.7 ± 13.3 | 18.2 ± 9.9 <sup>a</sup> | 22.5 ± 11.2 <sup>a</sup> | <.001 |
| Pathologically positive nodes | 0.66 ± 2.15 | 0.38 ± 0.93             | 0.74 ± 1.53              | .36   |
| ypCR                          | 29 (32)     | 36 (47)                 | 21 (30)                  | .058  |
| ypT0N+                        | 3 (3)       | 3 (4)                   | 5 (7)                    | .46   |
| Surgical radicality           |             |                         |                          | .42   |
| R0                            | 84 (91)     | 72 (93)                 | 61 (87)                  |       |
| R+                            | 8 (9)       | 5 (7)                   | 9 (13)                   |       |
| Tumor regression grade        |             |                         |                          | .016  |
| TRG1                          | 31 (34)     | 39 (51)                 | 26 (37)                  |       |
| TRG2                          | 20 (22)     | 13 (17)                 | 21 (30)                  |       |
| TRG3                          | 21 (23)     | 21 (27)                 | 13 (19)                  |       |
| TRG4                          | 20 (21)     | 4 (5) <sup>a</sup>      | 10 (14)                  |       |

Abbreviation: nCRT, neoadjuvant chemoradiotherapy; pCR, pathological complete response; TRG, tumor regression grade

<sup>a</sup>Statistically significant difference *versus* the CROSS group after application of the Bonferroni's correction for multiple comparisons.

Data are presented as means ± standard deviations or counts and percentages, as appropriate.

**Table S3. Differences between the current study and the work by Wong et al.** <sup>13</sup>

| Variable                      | Current study |           |           | Wong et al., 2020 |           |
|-------------------------------|---------------|-----------|-----------|-------------------|-----------|
| Study design                  | Multicenter   |           |           | Single-center     |           |
| Sample size (original cohort) | 334           |           |           | 319               |           |
| Adjustment for confounding    | IPTW of PS    |           |           | PSM               |           |
| Study period (years)          | 2012–2018     | 2010–2018 | 2010–2018 | 2012–2019         | 2002–2011 |
| Chemotherapy regimen          | CROSS         | PF4500    | PF5040    | CROSS             | PF        |
| Radiotherapy dose, Gy         | 41.4–45       | 45        | 50.4      | 41.4              | 40        |
| Age, years                    | 57            | 56        | 57        | 65**              | 64**      |
| cN+ rate                      | 96.6%         | 93.4%     | 94%       | 78%               | 78%       |
| Tumor length, cm              | 5.7           | 5.6       | 5.5       | 6**               | 6**       |
| Progression rate after nCRT   | 8.8%          | 11.4%     | 15.6%     | 17%               | 7%        |
| Mortality rate during nCRT    | 1.5%          | 2.6%      | 0.6%      | NA                | NA        |
| Surgery rate                  | 76.6%         | 69.2%     | 72.8%     | 69%               | 76%       |
| R0 resection rate             | 91.1%         | 87.5%     | 90.8%     | 85.5%             | 81.6%     |
| Number of dissected nodes     | 27.3          | 23.0      | 18.4      | 36**              | 33**      |
| pCR rate                      | 29.5%         | 31.6%     | 45.3%     | 24.6%             | 35.5%     |
| Median survival, months       | 28.5          | 20.9      | 19.5      | 16.7              | 32.7      |

Abbreviations: IPTW inverse probability of treatment weighting; PS, propensity score; PSM, propensity score matching; nCRT, neoadjuvant chemoradiotherapy; pCR, pathological complete response.

Data are presented as means or \*\*medians.
